# Supplementary material for: Synergistic Spatial Confining Effect and O Vacancy in WO3 Hollow Sphere for Enhanced N2 Reduction
Source: MDPI journal article supplement (doi:10.3390/molecules28248013), 2023-12-08
Supplement: s1 [file s1]

# Supporting Information

## Synergistic Spatial Confining Effect and O Vacancy in WO<sub>3</sub> Hollow Sphere for Enhanced N<sub>2</sub> Reduction

Yuzhou Xia <sup>1,2,3,†</sup>, Xinghe Xia <sup>1,2,†</sup>, Shuying Zhu <sup>1,\*</sup>, Ruowen Liang <sup>2</sup>, Guiyang Yan <sup>2</sup>, Feng Chen <sup>2,\*</sup> and Xuxu Wang <sup>3</sup>

<sup>1</sup> College of Chemistry, Fuzhou University, Fuzhou 350116, China; yzxia@ndnu.edu.cn (Y.X.); 211327039@fzu.edu.cn (X.X.)

<sup>2</sup> Fujian Province University Key Laboratory of Green Energy and Environment Catalysis, Ningde Normal University, Ningde 352100, China; rwliang@ndnu.edu.cn (R.L.); ygyfjnu@163.com (G.Y.)

<sup>3</sup> State Key Laboratory of Photocatalysis on Energy and Environment, Research Institute of Photocatalysis, College of Chemistry, Fuzhou University, Fuzhou 350116, China; xwang@fzu.edu.cn

\* Correspondence: syzhu@fzu.edu.cn (S.Z.); t9309@ndnu.edu.cn (F.C.)

† These authors contributed equally to this work.

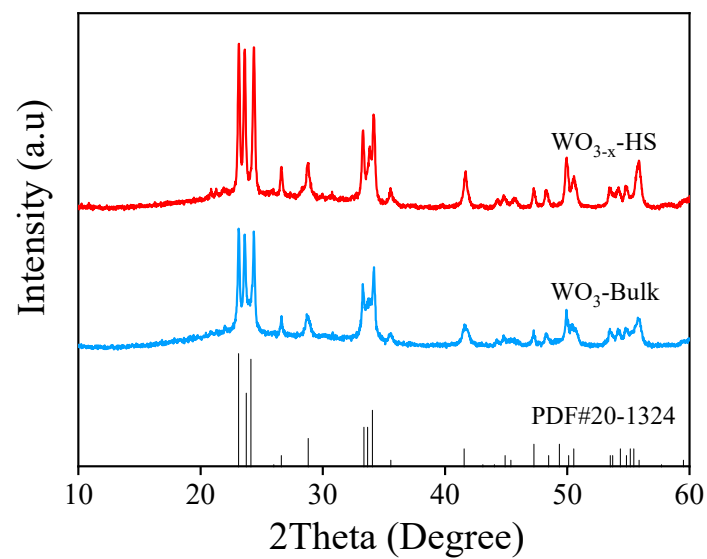

**Figure S1.** XRD pattern of  $\text{WO}_{3-x}\text{-HS}$  and  $\text{WO}_3\text{-bulk}$ .

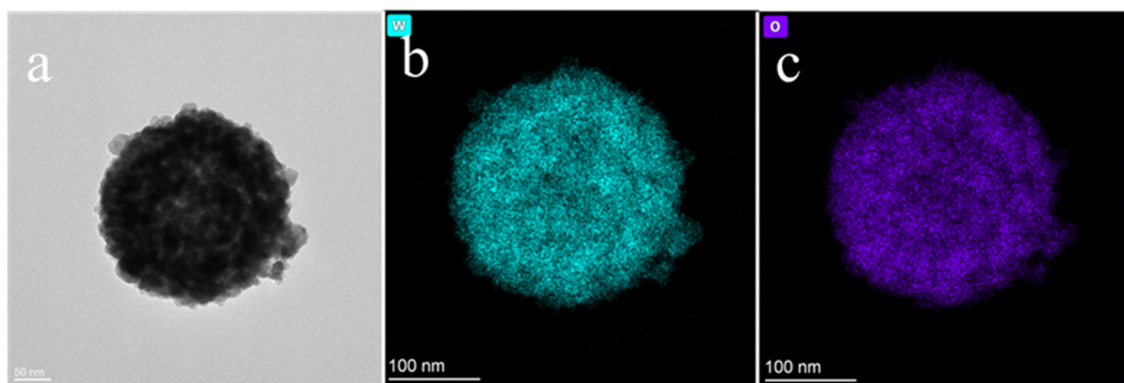

**Figure S2.** HAADF-STEM (a) and corresponding elemental mapping images W (b) and O (c) of  $\text{WO}_{3-x}\text{-HS}$ .

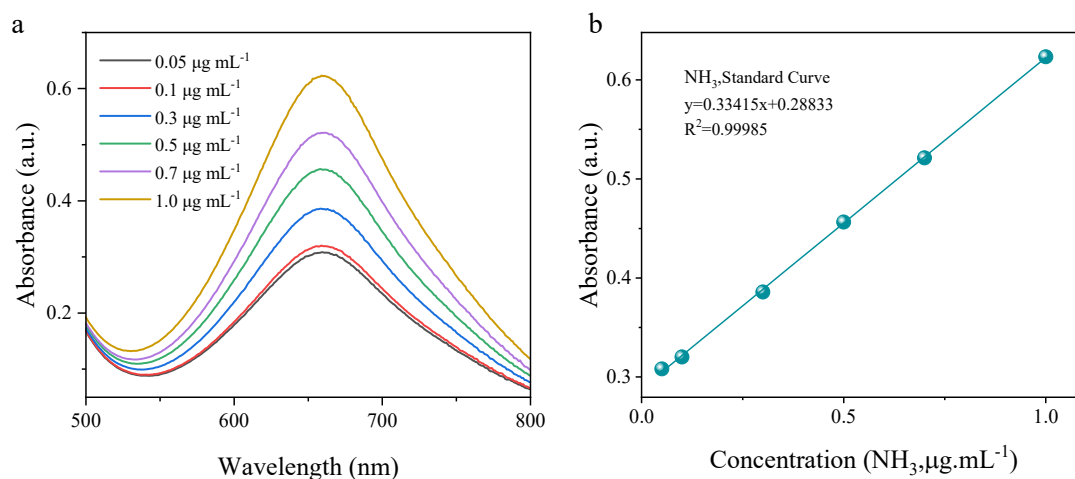

**Figure S3.** The calibration curve of  $\text{NH}_4^+$  reference by UV-vis spectra at room temperature.

**Table S1.** Comparison of photocatalytic N<sub>2</sub> reduction performance among reported catalysts.

| Catalyst                                                       | Light source                 | Reaction medium                                         | NH <sub>3</sub> yield rate (μmol g <sup>-1</sup> h <sup>-1</sup> ) | Ref.      |
|----------------------------------------------------------------|------------------------------|---------------------------------------------------------|--------------------------------------------------------------------|-----------|
| WO <sub>3-x</sub> -HS                                          | 300 W Xe lamp,<br>λ ≥ 420 nm | Water                                                   | 140.1                                                              | This work |
| WO <sub>3-x</sub>                                              | 300 W Xe lamp                | Methanol (12.5 vol%) aqueous solution                   | 28.4                                                               | 1         |
| NP WO <sub>3-x</sub>                                           | LED lamp (4 × 3 W)           | Na <sub>2</sub> SO <sub>3</sub> (1 mM) aqueous solution | 82.41                                                              | 2         |
| OVs-BWO                                                        | 300 W Xe lamp,<br>λ < 420 nm | Water                                                   | 106.4                                                              | 3         |
| MoO <sub>3-x</sub> /Fe-W <sub>18</sub> O <sub>49</sub>         | 300 W Xe lamp                | Water                                                   | 137.5                                                              | 4         |
| NH <sub>2</sub> -MIL-125 (Ti)                                  | 300 W Xe lamp,<br>λ > 400 nm | Water                                                   | 12.3                                                               | 5         |
| In <sub>2</sub> O <sub>3</sub> /In <sub>2</sub> S <sub>3</sub> | 300 W Xe lamp                | Water                                                   | 40.04                                                              | 6         |

|                                           |                                         |                                                         |        |    |
|-------------------------------------------|-----------------------------------------|---------------------------------------------------------|--------|----|
| FPx                                       | 300 W Xe lamp                           | Water                                                   | 62.42  | 7  |
| Cu <sub>2</sub> O/MIL-100(Fe)             | 300 W Xe lamp,<br>$\lambda > 400$       | Water                                                   | 51.22  | 8  |
| SMO-10                                    | 300 W Xe lamp                           | Water                                                   | 3.92   | 9  |
| Ru-TiO <sub>2</sub> NS                    | 300 W Xe lamp                           | Ethanol (20 vol%)<br>aqueous solution                   | 3.31   | 10 |
| NTO-0.5                                   | 300 W Xe lamp,<br>$\lambda > 400$       | Water                                                   | 80.09  | 11 |
| P-Fe/W <sub>18</sub> O <sub>49</sub>      | Xenon lamp                              | Na <sub>2</sub> SO <sub>3</sub> (1 mM) aqueous solution | 187.6  | 12 |
| 1 mol% Mo/W <sub>18</sub> O <sub>49</sub> | 300 W Xe lamp,<br>$\lambda \geq 400$ nm | Na <sub>2</sub> SO <sub>3</sub> (1 mM) aqueous solution | 195.5  | 13 |
| BCN                                       | 250 W Xe lamp,<br>$\lambda \geq 400$ nm | Na <sub>2</sub> SO <sub>3</sub> (1 mM) aqueous solution | 313.9  | 14 |
| BiCN <sub>x</sub> -5                      | 300 W Xe lamp,<br>$\lambda > 420$ nm    | Na <sub>2</sub> SO <sub>3</sub> (1 mM) aqueous solution | 576.11 | 15 |

---

## Reference

1. Shi, K.; Wang, F.; Li, X.; Huang, W.; Lu, K.; Yu, C.; Yang, K., Defect-engineered  $\text{WO}_{3-x}$  nanosheets for optimized photocatalytic nitrogen fixation and hydrogen production. *Journal of Materials Science* **2023**, 58, (42), 16309-16321.
2. Yang, Z.; Wang, J.; Wang, J.; Li, M.; Cheng, Q.; Wang, Z.; Wang, X.; Li, J.; Li, Y.; Zhang, G., 2D  $\text{WO}_{3-x}$  Nanosheet with Rich Oxygen Vacancies for Efficient Visible-Light-Driven Photocatalytic Nitrogen Fixation. *Langmuir* **2022**, 38, (3), 1178-1187.
3. Wang, T.; Feng, C.; Liu, J.; Wang, D.; Hu, H.; Hu, J.; Chen, Z.; Xue, G.,  $\text{Bi}_2\text{WO}_6$  hollow microspheres with high specific surface area and oxygen vacancies for efficient photocatalysis  $\text{N}_2$  fixation. *Chemical Engineering Journal* **2021**, 414.
4. Wang, L.; Wang, S.; Cui, D.; Li, M.; Yang, X.; Li, F.; Xu, L., Z-scheme heterojunctions with double vacancies semiconductors  $\text{MoO}_{3-x}$  and Fe-doped  $\text{W}_{18}\text{O}_{49}$  for photocatalytic nitrogen fixation. *Journal of Alloys and Compounds* **2022**, 927.
5. Huang, H.; Wang, X.-S.; Philo, D.; Ichihara, F.; Song, H.; Li, Y.; Li, D.; Qiu, T.; Wang, S.; Ye, J., Toward visible-light-assisted photocatalytic nitrogen fixation: A titanium metal organic framework with functionalized ligands. *Applied Catalysis B: Environmental* **2020**, 267.
6. Xu, H.; Wang, Y.; Dong, X.; Zheng, N.; Ma, H.; Zhang, X., Fabrication of

- In<sub>2</sub>O<sub>3</sub>/In<sub>2</sub>S<sub>3</sub> microsphere heterostructures for efficient and stable photocatalytic nitrogen fixation. *Applied Catalysis B: Environmental* **2019**, 257.
7. Hu, T.; Jiang, G.; Yan, Y.; Lan, S.; Xie, J.; Zhang, Q.; Li, Y., Facile synthesis of Fe single-atom porous photocatalysts via direct metal atomization achieving efficient photocatalytic nitrogen fixation. *Journal of Materials Science & Technology* **2023**, 167, 248-257.
  8. Huang, X.; Shi, Y.; Liu, C.; Wang, Z.; Bi, J.; Yu, J. C.; Wu, L., Enhanced photocatalytic nitrogen fixation on Cu<sub>2</sub>O clusters/MIL-100(Fe) heterojunction. *Applied Surface Science* **2023**, 640.
  9. Li, Q.; Zhao, Z.; Bai, X.; Tong, X.; Yue, S.; Luo, J.; Yu, X.; Wang, Z.; Wang, Z.; Li, P.; Liang, Y.; Wang, Z., Tunable and stable localized surface plasmon resonance in SrMoO<sub>4</sub> for enhanced visible light driven nitrogen reduction. *Chinese Journal of Catalysis* **2021**, 42, (10), 1763-1771.
  10. Liu, S.; Wang, Y.; Wang, S.; You, M.; Hong, S.; Wu, T.-S.; Soo, Y.-L.; Zhao, Z.; Jiang, G.; Jieshan, Q.; Wang, B.; Sun, Z., Photocatalytic Fixation of Nitrogen to Ammonia by Single Ru Atom Decorated TiO<sub>2</sub> Nanosheets. *ACS Sustainable Chemistry & Engineering* **2019**, 7, (7), 6813-6820.
  11. Li, C.; Gu, M.; Gao, M.; Liu, K.; Zhao, X.; Cao, N.; Feng, J.; Ren, Y.; Wei, T.; Zhang, M., N-doping TiO<sub>2</sub> hollow microspheres with abundant oxygen vacancies for highly photocatalytic nitrogen fixation. *Journal of Colloid and Interface Science* **2022**, 609, 341-352.

12. Dong, G.; Huang, X.; Bi, Y., Anchoring Black Phosphorus Quantum Dots on Fe-Doped  $W_{18}O_{49}$  Nanowires for Efficient Photocatalytic Nitrogen Fixation. *Angewandte Chemie International Edition* **2022**, 61, (30).
13. Zhang, N.; Jalil, A.; Wu, D.; Chen, S.; Liu, Y.; Gao, C.; Ye, W.; Qi, Z.; Ju, H.; Wang, C.; Wu, X.; Song, L.; Zhu, J.; Xiong, Y., Refining Defect States in  $W_{18}O_{49}$  by Mo Doping: A Strategy for Tuning  $N_2$  Activation towards Solar-Driven Nitrogen Fixation. *Journal of the American Chemical Society* **2018**, 140, (30), 9434-9443.
14. Wang, W.; Zhou, H.; Liu, Y.; Zhang, S.; Zhang, Y.; Wang, G.; Zhang, H.; Zhao, H., Formation of B-N-C Coordination to Stabilize the Exposed Active Nitrogen Atoms in g- $C_3N_4$  for Dramatically Enhanced Photocatalytic Ammonia Synthesis Performance. *Small* **2020**, 16, (13).
15. Liang, C.; Niu, H.-Y.; Guo, H.; Niu, C.-G.; Yang, Y.-Y.; Liu, H.-Y.; Tang, W.-W.; Feng, H.-P., Efficient photocatalytic nitrogen fixation to ammonia over bismuth monoxide quantum dots-modified defective ultrathin graphitic carbon nitride. *Chemical Engineering Journal* **2021**, 406.
